# Supplementary material
Source: publisher figshare collection journal article supplement (https://sage.figshare.com/ndownloader/files/38945159)
Supplement: Supplementary file 1 [file 38945159]

## Supplemental Material

**Table S1**

*Overview of Study Parts, Research Variables, Hypotheses, and Results*

| <b>Study Part</b>                       | <b>Relevant Variables</b>                                                           | <b>Preregistered Hypothesis</b>                                                                                                           | <b>Results</b>                                                                                                                                        |
|-----------------------------------------|-------------------------------------------------------------------------------------|-------------------------------------------------------------------------------------------------------------------------------------------|-------------------------------------------------------------------------------------------------------------------------------------------------------|
| <i>Study Part A: Laboratory</i>         | <i>Metaperceptions and other-perceptions of social inclusion</i>                    | <i>H1a: Metaperceptions of social inclusion are associated with momentary self-esteem, other-perceptions of social inclusion are not.</i> | <i>Metaperceptions positively relate to momentary self-esteem. Other-perceptions do not relate to momentary self-esteem in any model.<sup>1</sup></i> |
|                                         |                                                                                     | <i>H1b: Metaperceptions of social inclusion moderate the association between other-perceptions and momentary self-esteem.</i>             | <i>Metaperceptions moderated the association between other-perceptions and momentary self-esteem in 1 model.<sup>2</sup></i>                          |
| <i>Study Part B: ESM</i>                | <i>Self-perceptions and metaperceptions of social inclusion</i>                     | <i>H2a: Self-perceptions of social inclusion are associated with momentary self-esteem.</i>                                               | <i>Self-perceptions positively relate to momentary self-esteem.</i>                                                                                   |
|                                         |                                                                                     | <i>H2b: Metaperceptions of social inclusion predict momentary self-esteem above and beyond self-perceptions.</i>                          | <i>Metaperceptions do not relate to momentary self-esteem.<sup>1</sup></i>                                                                            |
| <i>Study Part B: Subsample analyses</i> | <i>Self-perceptions, metaperceptions, and other-perceptions of social inclusion</i> | <i>see Hypotheses 1 and 2</i>                                                                                                             | <i>Full model: Self-perceptions positively relate to momentary self-esteem; further perception types show no associations.</i>                        |
|                                         |                                                                                     |                                                                                                                                           | <i>Partial model<sup>3</sup>: Meta-perceptions positively relate to momentary self-esteem, other-perceptions do not.</i>                              |
| <i>Both Study Parts</i>                 | <i>Personality traits</i>                                                           | <i>Personality traits moderate the associations between interpersonal perceptions of social inclusion and momentary self-esteem.</i>      |                                                                                                                                                       |
|                                         |                                                                                     | <i>H3a: Neuroticism</i>                                                                                                                   | <i>Study Part A: N dampens the association between meta- and other-perceptions and momentary self-esteem.</i>                                         |
|                                         |                                                                                     |                                                                                                                                           | <i>Study Part B: No moderating effect.</i>                                                                                                            |
|                                         |                                                                                     | <i>H3b: Extraversion</i>                                                                                                                  | <i>No moderating effects.</i>                                                                                                                         |
|                                         |                                                                                     | <i>H3c: Agreeableness</i>                                                                                                                 | <i>Study Part A: No moderating effects.</i>                                                                                                           |
|                                         |                                                                                     |                                                                                                                                           | <i>Study Part B: A strengthens association between self-perceptions and momentary self-esteem.</i>                                                    |

*Note.* <sup>1</sup> The effects did not remain significant after adjusting *p*-values to control for multiple testing. <sup>2</sup> The moderation was significant in the model with neuroticism. <sup>3</sup> Partial model without self-perceptions at predictor at the within or between-person level.

*Johnson-Neyman Plot Showing the Interaction between Metaperceptions and Other-Perceptions of Social Inclusion on Momentary Self-Esteem in the Model with Neuroticism as*

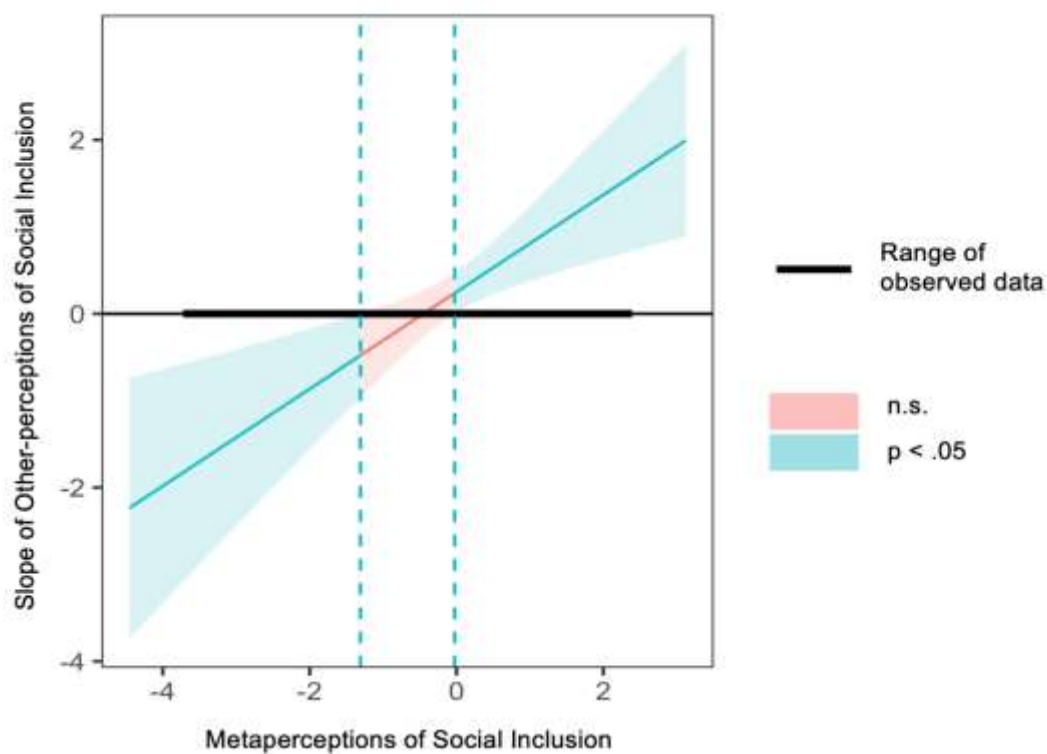

*a Predictor at Level 2*

*Note.* Significant moderation effects of metaperceptions on other-perceptions of social inclusion are indicated by the green line, whereas non-significant moderation effects are indicated by a red line. Accordingly, the figure shows that positive metaperceptions above a value of 0 significantly strengthen the association between other-perceptions and momentary self-esteem, while negative metaperceptions below a value of -1.5 weaken this link.

## Power Simulations

Power simulations were carried out for two parameters (1) the simple within-person effect of metaperceptions (in Part A) or self-perceptions of social inclusion (in Part B and the subsample analysis), and (2) the simple between-person effect of neuroticism. We assessed power as the relative number of  $p$ -values below .05. All simulations were run with the R package “SimrR” (Green & MacLeod, 2016) with 500 iterations. Consistent with previous literature (Cohen, 1988), a power of 80% or more can be considered satisfactory. In our power simulation, we applied a stepwise approach and moved from larger to smaller estimates for each level, stopping when the power fell below the threshold of sufficient power (i.e., < .80).

**Table S2**

*Power Simulations for Study Part A, Study Part B, and the Subsample Analysis*

|                    | Part A                | Part B                | Subsample Analysis    |
|--------------------|-----------------------|-----------------------|-----------------------|
| <i>L1-estimate</i> |                       |                       |                       |
| .40                | 94.60% (93.01, 95.92) | 100.0% (99.26, 100.0) | 100.0% (99.26, 100.0) |
| .35                | 88.00% (84.82, 90.72) | /                     | /                     |
| .30                | 76.50% (73.75, 79.10) | /                     | 99.00% (97.68, 99.67) |
| .20                | /                     | /                     | 82.60% (78.99, 85.82) |
| .15                | /                     | /                     | 59.80% (55.35, 64.13) |
| .10                | /                     | 95.80% (93.65, 97.38) | /                     |
| <i>L2-estimate</i> |                       |                       |                       |
| .45                | 84.60% (81.13, 87.65) |                       |                       |
| .40                | 74.20% (70.13, 77.98) | 98.80% (97.41, 99.56) | 91.80% (89.04, 94.05) |
| .35                | 63.00% (58.60, 67.24) | /                     | 84.00% (80.49, 87.10) |
| .30                | /                     | 90.60% (87.70, 93.01) | 76.00% (72.01, 79.68) |
| .25                | /                     | 80.00% (70.82, 87.33) | 56.60% (52.13, 60.99) |
| .20                | /                     | 53.80% (49.32, 58.24) | /                     |

*Note.* Values in brackets indicate 95% confidence interval.

**Table S3**

| Variable                         | <i>M</i> | <i>SD</i> | <i>ICC</i> |       |       |       |       |       |     | <i>Intercorrelations among</i>         |
|----------------------------------|----------|-----------|------------|-------|-------|-------|-------|-------|-----|----------------------------------------|
|                                  |          |           |            | 1     | 2     | 3     | 4     | 5     | 6   |                                        |
| 1. Momentary Self-Esteem         | 6.93     | 2.16      | .54        |       |       |       |       |       |     | <i>Within-Person Variables for the</i> |
| 2. Self-Perception               | 8.48     | 1.48      | .32        | .26** |       |       |       |       |     |                                        |
| 3. Metaperception                | 8.09     | 1.54      | .43        | .26** | .75** |       |       |       |     |                                        |
| 4. Other-Perception              | 8.68     | 1.52      | .16        | .17** | .47** | .48** |       |       |     |                                        |
| 5. Level of Acquaintance         | 8.75     | 1.53      | .22        | .13** | .12** | .23** | .07   |       |     |                                        |
| 6. Day of ESM                    | 2.61     | 2.11      | .04        | – .01 | .10*  | .09*  | .06   | – .02 |     |                                        |
| 7. Gender of Interaction Partner | 0.34     | 0.47      | .22        | .01   | – .05 | – .05 | – .03 | – .04 | .05 |                                        |

*Subsample-Analysis in Study Part B*

*Note.*  $N = 628$  observations nested in 178 individuals. *M* and *SD* represent mean and standard deviation. Gender of interaction partner was coded 0 for same-sex and 1 for other-sex regarding the gender of the participant. \* indicates  $p < .05$ , \*\* indicates  $p < .01$ .

**Table S4**

*Intercorrelations among Between-Person Variables for the Subsample-Analysis in Study Part B*

| Variable                 | <i>M</i> | <i>SD</i> | 1       | 2       | 3     | 4     | 5     | 6     | 7     | 8      |
|--------------------------|----------|-----------|---------|---------|-------|-------|-------|-------|-------|--------|
| 1. Momentary Self-Esteem | 6.92     | 1.83      |         |         |       |       |       |       |       |        |
| 2. Neuroticism           | 3.88     | 1.09      | – .47** |         |       |       |       |       |       |        |
| 3. Extraversion          | 4.77     | 0.95      | .27**   | – .26** |       |       |       |       |       |        |
| 4. Agreeableness         | 5.13     | 0.78      | .17**   | – .27** | .20** |       |       |       |       |        |
| 5. Self-Perception       | 8.47     | 1.25      | .27**   | – .13   | .14   | .32** |       |       |       |        |
| 6. Metaperception        | 8.14     | 1.37      | .28**   | – .18*  | .17*  | .33** | .82** |       |       |        |
| 7. Other-Perception      | 8.70     | 1.14      | .23**   | – .12   | .07   | .32** | .62** | .66** |       |        |
| 8. Age                   | 17.62    | 0.93      | – .02   | – .07   | – .02 | – .07 | – .03 | – .07 | .00   |        |
| 9. Gender                | 0.78     | 0.41      | – .12   | .35**   | – .05 | .10   | .05   | .00   | – .01 | – .16* |

*Note.* *N* = 178 individuals. *M* and *SD* represent mean and standard deviation. Situational variables (momentary self-esteem, self-, meta-, and other-perceptions of social inclusion) were averaged across rating rounds and individuals. Gender was coded 0 for males and 1 for females. \* indicates  $p < .05$ , \*\* indicates  $p < .01$ .

**Table S5**

*Multilevel Models explaining Momentary Self-Esteem as a Function of Meta, and Other-Perceptions of Social Inclusion, Personality Traits, and Covariates for the Subsample-Analysis in Study Part B*

|                                                      | Basic Model |           |             | Neuroticism |           |             | Extraversion |           |             | Agreeableness |           |             |
|------------------------------------------------------|-------------|-----------|-------------|-------------|-----------|-------------|--------------|-----------|-------------|---------------|-----------|-------------|
|                                                      | Model 1     |           |             | Model 2a    |           |             | Model 2b     |           |             | Model 2c      |           |             |
|                                                      | <i>Est.</i> | <i>SE</i> | <i>p</i>    | <i>Est.</i> | <i>SE</i> | <i>p</i>    | <i>Est.</i>  | <i>SE</i> | <i>p</i>    | <i>Est.</i>   | <i>SE</i> | <i>p</i>    |
| <b>Fixed Effects</b>                                 |             |           |             |             |           |             |              |           |             |               |           |             |
| Intercept, $\gamma_{00}$                             | 7.25        | 0.29      | < .001      | 6.74        | 0.27      | < .001      | 7.22         | 0.29      | < .001      | 7.31          | 0.29      | < .001      |
| <i>Within-person effects</i>                         |             |           |             |             |           |             |              |           |             |               |           |             |
| Metaperception, $\gamma_{10}$                        | 0.21        | 0.06      | .001        | 0.22        | 0.06      | < .001      | 0.20         | 0.06      | .001        | 0.22          | 0.06      | < .001      |
| Other-Perception, $\gamma_{20}$                      | 0.04        | 0.05      | .469        | 0.02        | 0.05      | .721        | 0.04         | 0.05      | .401        | 0.05          | 0.05      | .344        |
| Meta x Other-Perception, $\gamma_{30}$               | 0.01        | 0.05      | .833        | − 0.01      | 0.05      | .912        | 0.02         | 0.05      | .743        | 0.02          | 0.05      | .670        |
| Level of Acquaintance, $\gamma_{40}$                 | − 0.01      | 0.05      | .871        | 0.00        | 0.05      | .996        | − 0.01       | 0.05      | .896        | 0.01          | 0.05      | .813        |
| Day of ESM, $\gamma_{50}$                            | − 0.02      | 0.03      | .565        | − 0.02      | 0.03      | .512        | − 0.02       | 0.03      | .555        | − 0.02        | 0.03      | .448        |
| Gender of Interaction Partner, $\gamma_{60}$         | 0.25        | 0.15      | .092        | 0.26        | 0.15      | .074        | 0.24         | 0.15      | .101        | 0.26          | 0.15      | .080        |
| <i>Between-person effects</i>                        |             |           |             |             |           |             |              |           |             |               |           |             |
| Metaperception, $\gamma_{01}$                        | 0.34        | 0.13      | .010        | 0.23        | 0.12      | .055        | 0.27         | 0.13      | .038        | 0.30          | 0.13      | .021        |
| Other-perception, $\gamma_{02}$                      | 0.13        | 0.16      | .400        | 0.12        | 0.14      | .380        | 0.15         | 0.15      | .316        | 0.10          | 0.16      | .523        |
| Gender, $\gamma_{03}$                                | − 0.54      | 0.32      | .095        | 0.18        | 0.31      | .566        | − 0.50       | 0.31      | .108        | − 0.60        | 0.32      | .060        |
| Personality, $\gamma_{04}$                           |             |           |             | − 0.76      | 0.12      | < .001      | 0.43         | 0.14      | .002        | 0.24          | 0.18      | .188        |
| <i>Cross-level interactions</i>                      |             |           |             |             |           |             |              |           |             |               |           |             |
| Personality x Metaperception, $\gamma_{11}$          |             |           |             | − 0.03      | 0.05      | .587        | 0.00         | 0.07      | .999        | 0.19          | 0.07      | .188        |
| Personality x Other-Perception, $\gamma_{21}$        |             |           |             | 0.06        | 0.05      | .270        | − 0.06       | 0.05      | .254        | − 0.07        | 0.06      | .240        |
| Personality x Meta x Other-Perception, $\gamma_{31}$ |             |           |             | − 0.01      | 0.04      | .743        | 0.01         | 0.06      | .846        | 0.16          | 0.06      | .008        |
| <b>Random Effects</b>                                |             |           |             |             |           |             |              |           |             |               |           |             |
| Variance Intercept, $\sigma_{u_0}^2$                 |             |           | 2.16        |             |           | 1.56        |              |           | 2.01        |               |           | 2.09        |
| Residual Variance, $\sigma_e^2$                      |             |           | 2.02        |             |           | 2.02        |              |           | 2.02        |               |           | 1.98        |
| ICC                                                  |             |           | 0.52        |             |           | 0.44        |              |           | 0.50        |               |           | 0.51        |
| AIC                                                  |             |           | 2498.18     |             |           | 2465.22     |              |           | 2494.76     |               |           | 2489.44     |
| $R_w^2 / R_b^2$                                      |             |           | 0.09 / 0.11 |             |           | 0.22 / 0.31 |              |           | 0.12 / 0.16 |               |           | 0.12 / 0.14 |

*Note.*  $N = 178$  individuals.  
 $R_w^2$  indicates modeled variance.  
 $p$  indicates significance level of parameter.

**Table S6**

*Unstandardized Regression Effects of Meta and Other-Perceptions and Personality on Momentary Self-Esteem in Study Part A, Including*

|                                                      |                    |          |             |                    |          |             |                     |          |             |                      |          |             |             |
|------------------------------------------------------|--------------------|----------|-------------|--------------------|----------|-------------|---------------------|----------|-------------|----------------------|----------|-------------|-------------|
|                                                      |                    |          |             |                    |          |             |                     |          |             |                      |          |             | Unadjusted  |
|                                                      | <b>Basic Model</b> |          |             | <b>Neuroticism</b> |          |             | <b>Extraversion</b> |          |             | <b>Agreeableness</b> |          |             | and         |
|                                                      | Model 1            |          |             | Model 2a           |          |             | Model 2b            |          |             | Model 2c             |          |             | adjusted    |
|                                                      | <i>Est.</i>        | <i>p</i> | BH          | <i>Est.</i>        | <i>p</i> | BH          | <i>Est.</i>         | <i>p</i> | BH          | <i>Est.</i>          | <i>p</i> | BH          | and         |
| <b>Fixed Effects</b>                                 |                    |          |             |                    |          |             |                     |          |             |                      |          |             | Adjusted    |
| <i>Within-person effects</i>                         |                    |          |             |                    |          |             |                     |          |             |                      |          |             | <i>d p-</i> |
| Metaperception, $\gamma_{10}$                        | 0.34               | .002     | .010        | 0.34               | .002     | .010        | 0.35                | .003     | .010        | 0.35                 | .003     | .010        | Values      |
| Other-Perception, $\gamma_{20}$                      | 0.23               | .065     | .120        | 0.25               | .039     | .078        | 0.26                | .036     | .077        | 0.22                 | .072     | .122        |             |
| Meta x Other-Perception, $\gamma_{30}$               | 0.28               | .057     | .109        | 0.56               | .001     | .007        | 0.32                | .034     | .077        | 0.28                 | .079     | .126        |             |
| <i>Between-person effects</i>                        |                    |          |             |                    |          |             |                     |          |             |                      |          |             |             |
| Metaperception, $\gamma_{01}$                        | 0.77               | < .001   | < .001      | 0.48               | < .001   | .004        | 0.63                | < .001   | < .001      | 0.68                 | < .001   | < .001      |             |
| Other-perception, $\gamma_{02}$                      | 0.15               | .265     | .356        | 0.16               | .187     | .275        | 0.06                | .661     | .756        | 0.17                 | .212     | .298        |             |
| Personality, $\gamma_{04}$                           |                    |          |             | -0.70              | < .001   | < .001      | 0.37                | .026     | .072        | 0.47                 | .034     | .077        |             |
| <i>Cross-level interactions</i>                      |                    |          |             |                    |          |             |                     |          |             |                      |          |             |             |
| Personality x Metaperception, $\gamma_{11}$          |                    |          |             | -0.04              | .705     | .611        | -0.11               | .321     | .412        | 0.01                 | .961     | .961        |             |
| Personality x Other-Perception, $\gamma_{21}$        |                    |          |             | 0.08               | .509     | .778        | 0.07                | .515     | .611        | -0.02                | .916     | .946        |             |
| Personality x Meta x Other-Perception, $\gamma_{31}$ |                    |          |             | -0.35              | .015     | .042        | -0.26               | .113     | .172        | 0.04                 | .877     | .935        |             |
| <b>Random Effects</b>                                |                    |          |             |                    |          |             |                     |          |             |                      |          |             |             |
| Variance Intercept, $\sigma_{u_0}^2$                 |                    |          | 1.57        |                    |          | 1.13        |                     |          | 1.41        |                      |          | 1.46        |             |
| Residual Variance, $\sigma_e^2$                      |                    |          | 1.99        |                    |          | 1.91        |                     |          | 1.95        |                      |          | 1.99        |             |
| ICC                                                  |                    |          | 0.44        |                    |          | 0.37        |                     |          | 0.42        |                      |          | 0.42        |             |
| AIC                                                  |                    |          | 1208.27     |                    |          | 1185.31     |                     |          | 1205.45     |                      |          | 1211.44     |             |
| $R_w^2 / R_b^2$                                      |                    |          | 0.22 / 0.29 |                    |          | 0.33 / 0.44 |                     |          | 0.26 / 0.34 |                      |          | 0.25 / 0.32 |             |



Note.  $N = 101$  individuals providing 303 observations.  $R_w^2$  indicates modeled variance at the within-person level,  $R_b^2$  indicates modeled variance at the between-person level.  $p$  = unadjusted  $p$ -value, BH = adjusted  $p$ -value after Benjamini & Hochberg (FDR).

**Table S7**

*Unstandardized Regression Effects of Meta and Other-Perceptions and Personality on Momentary Self-Esteem in Study Part B, Including*

|                                              |      |        |        |             |        |        |              |        |        |               |        |        | Unadju |
|----------------------------------------------|------|--------|--------|-------------|--------|--------|--------------|--------|--------|---------------|--------|--------|--------|
|                                              |      |        |        |             |        |        |              |        |        |               |        |        | sted   |
| Basic Model                                  |      |        |        | Neuroticism |        |        | Extraversion |        |        | Agreeableness |        |        |        |
| Model 1                                      |      |        |        | Model 2a    |        |        | Model 2b     |        |        | Model 2c      |        |        | and    |
|                                              | Est. | p      | BH     | Est.        | p      | BH     | Est.         | p      | BH     | Est.          | p      | BH     |        |
| Fixed Effects                                |      |        |        |             |        |        |              |        |        |               |        |        |        |
| Within-person effects                        |      |        |        |             |        |        |              |        |        |               |        |        |        |
| Self-perception, $\gamma_{10}$               | 0.24 | < .001 | < .001 | 0.25        | < .001 | < .001 | 0.25         | < .001 | < .001 | 0.26          | < .001 | < .001 |        |
| Metaperception, $\gamma_{20}$                | 0.06 | .041   | .085   | 0.06        | .038   | .085   | 0.06         | .038   | .085   | 0.05          | .079   | .124   | d p-   |
| Between-person effects                       |      |        |        |             |        |        |              |        |        |               |        |        |        |
| Self-perception, $\gamma_{01}$               | 0.21 | .352   | .489   | 0.15        | .458   | .546   | 0.18         | .404   | .518   | 0.19          | .414   | .518   | Values |
| Metaperception, $\gamma_{02}$                | 0.48 | .028   | .085   | 0.35        | .073   | .123   | 0.41         | .056   | .110   | 0.46          | .035   | .085   |        |
| Personality, $\gamma_{04}$                   |      |        |        | − 0.76      | < .001 | < .001 | 0.40         | < .001 | .001   | 0.16          | .265   | .391   |        |
| Cross-level interactions                     |      |        |        |             |        |        |              |        |        |               |        |        |        |
| Personality x Self-perception, $\gamma_{11}$ |      |        |        | − 0.01      | .804   | .809   | − 0.02       | .487   | .553   | 0.08          | .005   | .016   |        |
| Personality x Metaperception, $\gamma_{21}$  |      |        |        | − 0.01      | .809   | .809   | 0.06         | .064   | .114   | − 0.02        | .514   | .559   |        |
| Random Effects                               |      |        |        |             |        |        |              |        |        |               |        |        |        |
| Variance Intercept, $\sigma_{u_0}^2$         |      |        | 2.03   |             |        | 1.50   |              |        | 1.89   |               |        | 2.01   |        |
| Residual Variance, $\sigma_e^2$              |      |        | 2.34   |             |        | 2.34   |              |        | 2.34   |               |        | 2.33   |        |

|                 |             |             |             |             |
|-----------------|-------------|-------------|-------------|-------------|
| ICC             | 0.46        | 0.39        | 0.45        | 0.46        |
| AIC             | 11338.63    | 11286.43    | 11326.64    | 11331.54    |
| $R_w^2 / R_b^2$ | 0.16 / 0.22 | 0.26 / 0.40 | 0.19 / 0.27 | 0.16 / 0.22 |

*Note.*  $N = 218$  individuals providing 2,928 observations.  $R_w^2$  indicates modeled variance at the within-person level,  $R_b^2$  indicates modeled variance at the between-person level.  $p$  = unadjusted  $p$ -value, BH = adjusted  $p$ -value after Benjamini & Hochberg (FDR).

|  | Basic Model |          |    | Neuroticism |          |    | Extraversion |          |    | Agreeableness |          |    |
|--|-------------|----------|----|-------------|----------|----|--------------|----------|----|---------------|----------|----|
|  | Model 1     |          |    | Model 2a    |          |    | Model 2b     |          |    | Model 2c      |          |    |
|  | <i>Est.</i> | <i>p</i> | BH | <i>Est.</i> | <i>p</i> | BH | <i>Est.</i>  | <i>p</i> | BH | <i>Est.</i>   | <i>p</i> | BH |

#### Fixed Effects

*Within-person effects*

|                                                   |      |        |             |        |        |             |        |        |             |        |        |             |                           |
|---------------------------------------------------|------|--------|-------------|--------|--------|-------------|--------|--------|-------------|--------|--------|-------------|---------------------------|
| Self-perception, $\gamma_{10}$                    | 0.34 | < .001 | < .001      | 0.34   | < .001 | < .001      | 0.33   | < .001 | < .001      | 0.26   | < .001 | < .001      | <b>Table<br/>S8</b>       |
| Metaperception, $\gamma_{20}$                     | 0.01 | .909   | .978        | 0.01   | .897   | .978        | 0.00   | .952   | .989        | 0.05   | .079   | .870        |                           |
| Other-Perception, $\gamma_{30}$                   | 0.00 | .972   | .989        | −0.01  | .833   | .968        | 0.01   | .875   | .976        | 0.01   | .788   | .968        |                           |
| Meta x Other-Perception, $\gamma_{40}$            | 0.03 | .578   | .870        | 0.01   | .785   | .968        | 0.03   | .480   | .870        | 0.04   | .443   | .870        |                           |
| <i>Between-person effects</i>                     |      |        |             |        |        |             |        |        |             |        |        |             |                           |
| Self-perception, $\gamma_{01}$                    | 0.10 | .626   | .870        | 0.09   | .611   | .870        | 0.09   | .637   | .870        | 0.19   | .414   | .870        | <i>Unstan<br/>dardize</i> |
| Metaperception, $\gamma_{02}$                     | 0.27 | .144   | .566        | 0.16   | .331   | .870        | 0.21   | .260   | .747        | 0.46   | .198   | .610        |                           |
| Other-perception, $\gamma_{03}$                   | 0.12 | .448   | .870        | 0.11   | .424   | .870        | 0.14   | .355   | .870        | 0.09   | .571   | .870        |                           |
| Personality, $\gamma_{04}$                        |      |        |             | − 0.76 | < .001 | < .001      | 0.43   | .002   | .015        | 0.16   | .265   | .610        |                           |
| <i>Cross-level interactions</i>                   |      |        |             |        |        |             |        |        |             |        |        |             |                           |
| Personality x Self-perception, $\gamma_{11}$      |      |        |             | 0.11   | .079   | .377        | 0.05   | .509   | .870        | − 0.04 | .667   | .870        | <i>d<br/>Regres</i>       |
| Personality x Metaperception, $\gamma_{21}$       |      |        |             | − 0.09 | .134   | .566        | − 0.02 | .827   | .968        | 0.18   | .031   | .167        |                           |
| Personality x Other-Perception, $\gamma_{31}$     |      |        |             | 0.04   | .502   | .870        | − 0.07 | .162   | .579        | − 0.05 | .420   | .870        |                           |
| Personality x Meta x Other-Perception, $\gamma_4$ |      |        |             | − 0.00 | .989   | .989        | 0.03   | .635   | .870        | 0.14   | .013   | .079        |                           |
| <b>Random Effects</b>                             |      |        |             |        |        |             |        |        |             |        |        |             |                           |
| Variance Intercept, $\sigma_{u_0}^2$              |      |        | 2.20        |        |        | 1.60        |        |        | 2.05        |        |        | 2.12        | <i>sion<br/>Effects</i>   |
| Residual Variance, $\sigma_e^2$                   |      |        | 1.93        |        |        | 1.91        |        |        | 1.91        |        |        | 1.98        |                           |
| ICC                                               |      |        | 0.53        |        |        | 0.46        |        |        | 0.52        |        |        | 0.53        |                           |
| AIC                                               |      |        | 2479.57     |        |        | 2445.07     |        |        | 2477.03     |        |        | 2559.70     |                           |
| $R_w^2 / R_b^2$                                   |      |        | 0.10 / 0.11 |        |        | 0.23 / 0.31 |        |        | 0.14 / 0.16 |        |        | 0.13 / 0.14 | <i>of</i>                 |

*Meta and Other-Perceptions and Personality on Momentary Self-Esteem in Study Part B Subsample Analysis, Including Unadjusted and Adjusted*

*p-Values*

*Note.*  $N = 178$  individuals providing 628 observations.  $R_w^2$  indicates modeled variance at the within-person level,  $R_b^2$  indicates modeled variance at the between-person level.  $p$  = unadjusted  $p$ -value, BH = adjusted  $p$ -value after Benjamini & Hochberg (FDR).

**Table S9**

*Unstandardized Regression Effects of Meta and Other-Perceptions and Personality on Momentary Self-Esteem in Study Part B Subsample Analysis,*

|                                                   |      |      |             |        |        |              |        |      |               |        |        | Includi     |        |
|---------------------------------------------------|------|------|-------------|--------|--------|--------------|--------|------|---------------|--------|--------|-------------|--------|
|                                                   |      |      |             |        |        |              |        |      |               |        |        | ng          |        |
| Basic Model                                       |      |      | Neuroticism |        |        | Extraversion |        |      | Agreeableness |        |        |             |        |
| Model 1                                           |      |      | Model 2a    |        |        | Model 2b     |        |      | Model 2c      |        |        |             |        |
| Est.                                              | p    | BH   | Est.        | p      | BH     | Est.         | p      | BH   | Est.          | p      | BH     | Unadju      |        |
| Fixed Effects                                     |      |      |             |        |        |              |        |      |               |        |        |             |        |
| Within-person effects                             |      |      |             |        |        |              |        |      |               |        |        | sted        |        |
| Metaperception, $\gamma_{20}$                     | 0.21 | .001 | .007        | 0.22   | < .001 | .005         | 0.20   | .001 | .009          | 0.22   | < .001 | .005        |        |
| Other-Perception, $\gamma_{30}$                   | 0.04 | .469 | .682        | 0.02   | .721   | .849         | 0.04   | .401 | .611          | 0.05   | .344   | .611        | and    |
| Meta x Other-Perception, $\gamma_{40}$            | 0.01 | .833 | .902        | − 0.01 | .912   | .941         | 0.02   | .743 | .849          | 0.02   | .670   | .849        |        |
| Between-person effects                            |      |      |             |        |        |              |        |      |               |        |        | Adjuste     |        |
| Metaperception, $\gamma_{02}$                     | 0.34 | .010 | .036        | 0.23   | .055   | .149         | 0.27   | .038 | .113          | 0.30   | .021   | .032        |        |
| Other-perception, $\gamma_{03}$                   | 0.13 | .400 | .611        | 0.12   | .380   | .611         | 0.15   | .316 | .595          | 0.10   | .523   | .729        |        |
| Personality, $\gamma_{04}$                        |      |      |             | − 0.76 | < .001 | < .001       | 0.43   | .002 | .010          | 0.24   | .188   | .467        | d p-   |
| Cross-level interactions                          |      |      |             |        |        |              |        |      |               |        |        |             |        |
| Personality x Metaperception, $\gamma_{21}$       |      |      |             | − 0.03 | .587   | .783         | 0.00   | .999 | .999          | 0.19   | .008   | .032        | Values |
| Personality x Other-Perception, $\gamma_{31}$     |      |      |             | 0.06   | .270   | .540         | − 0.06 | .254 | .540          | − 0.07 | .240   | .540        |        |
| Personality x Meta x Other-Perception, $\gamma_4$ |      |      |             | − 0.01 | .743   | .849         | 0.01   | .846 | .902          | 0.16   | .008   | .032        |        |
| Random Effects                                    |      |      |             |        |        |              |        |      |               |        |        |             |        |
| Variance Intercept, $\sigma_{u_0}^2$              |      |      | 2.16        |        |        | 1.56         |        |      | 2.01          |        |        | 2.09        |        |
| Residual Variance, $\sigma_e^2$                   |      |      | 2.02        |        |        | 2.02         |        |      | 2.02          |        |        | 1.98        |        |
| ICC                                               |      |      | 0.52        |        |        | 0.44         |        |      | 0.50          |        |        | 0.51        |        |
| AIC                                               |      |      | 2498.18     |        |        | 2465.22      |        |      | 2494.76       |        |        | 2489.44     |        |
| $R_w^2 / R_b^2$                                   |      |      | 0.09 / 0.11 |        |        | 0.22 / 0.31  |        |      | 0.12 / 0.16   |        |        | 0.12 / 0.14 |        |

*Note.*  $N = 178$  individuals providing 628 observations.  $R_w^2$  indicates modeled variance at the within-person level,  $R_b^2$  indicates modeled variance at the between-person level.  $p$  = unadjusted  $p$ -value, BH = adjusted  $p$ -value after Benjamini & Hochberg (FDR).
